# Supplementary material for: New Precursors to 3-Sulfanylhexan-1-ol? Investigating the Keto–Enol Tautomerism of 3-S-Glutathionylhexanal
Source: MDPI journal article supplement (doi:10.3390/molecules26144261), 2021-07-14
Supplement: s1 [file s1]

# New Precursors to 3-Sulfanylhexasan-1-ol? Investigating the Keto-Enol Tautomerism of 3-S-Glutathionylhexanal

Jennifer R. Muhl<sup>a</sup>

Lisa I. Pilkington<sup>a</sup>

Rebecca C. Deed<sup>\*a,b</sup>

<sup>a</sup> School of Chemical Sciences, University of Auckland, Private Bag 92019, Auckland 1142, New Zealand.

<sup>b</sup> School of Biological Sciences, University of Auckland, Private Bag 92019, Auckland 1142, New Zealand.

\* indicates the corresponding author.

rebecca.deed@auckland.ac.nz

## Supporting Information

### Contents

1. HRMS Spectra of Glut-3SH-al-*d*<sub>2</sub>
2. <sup>1</sup>H NMR of Glut-3SH-al
3. <sup>13</sup>C NMR of Glut-3SH-al

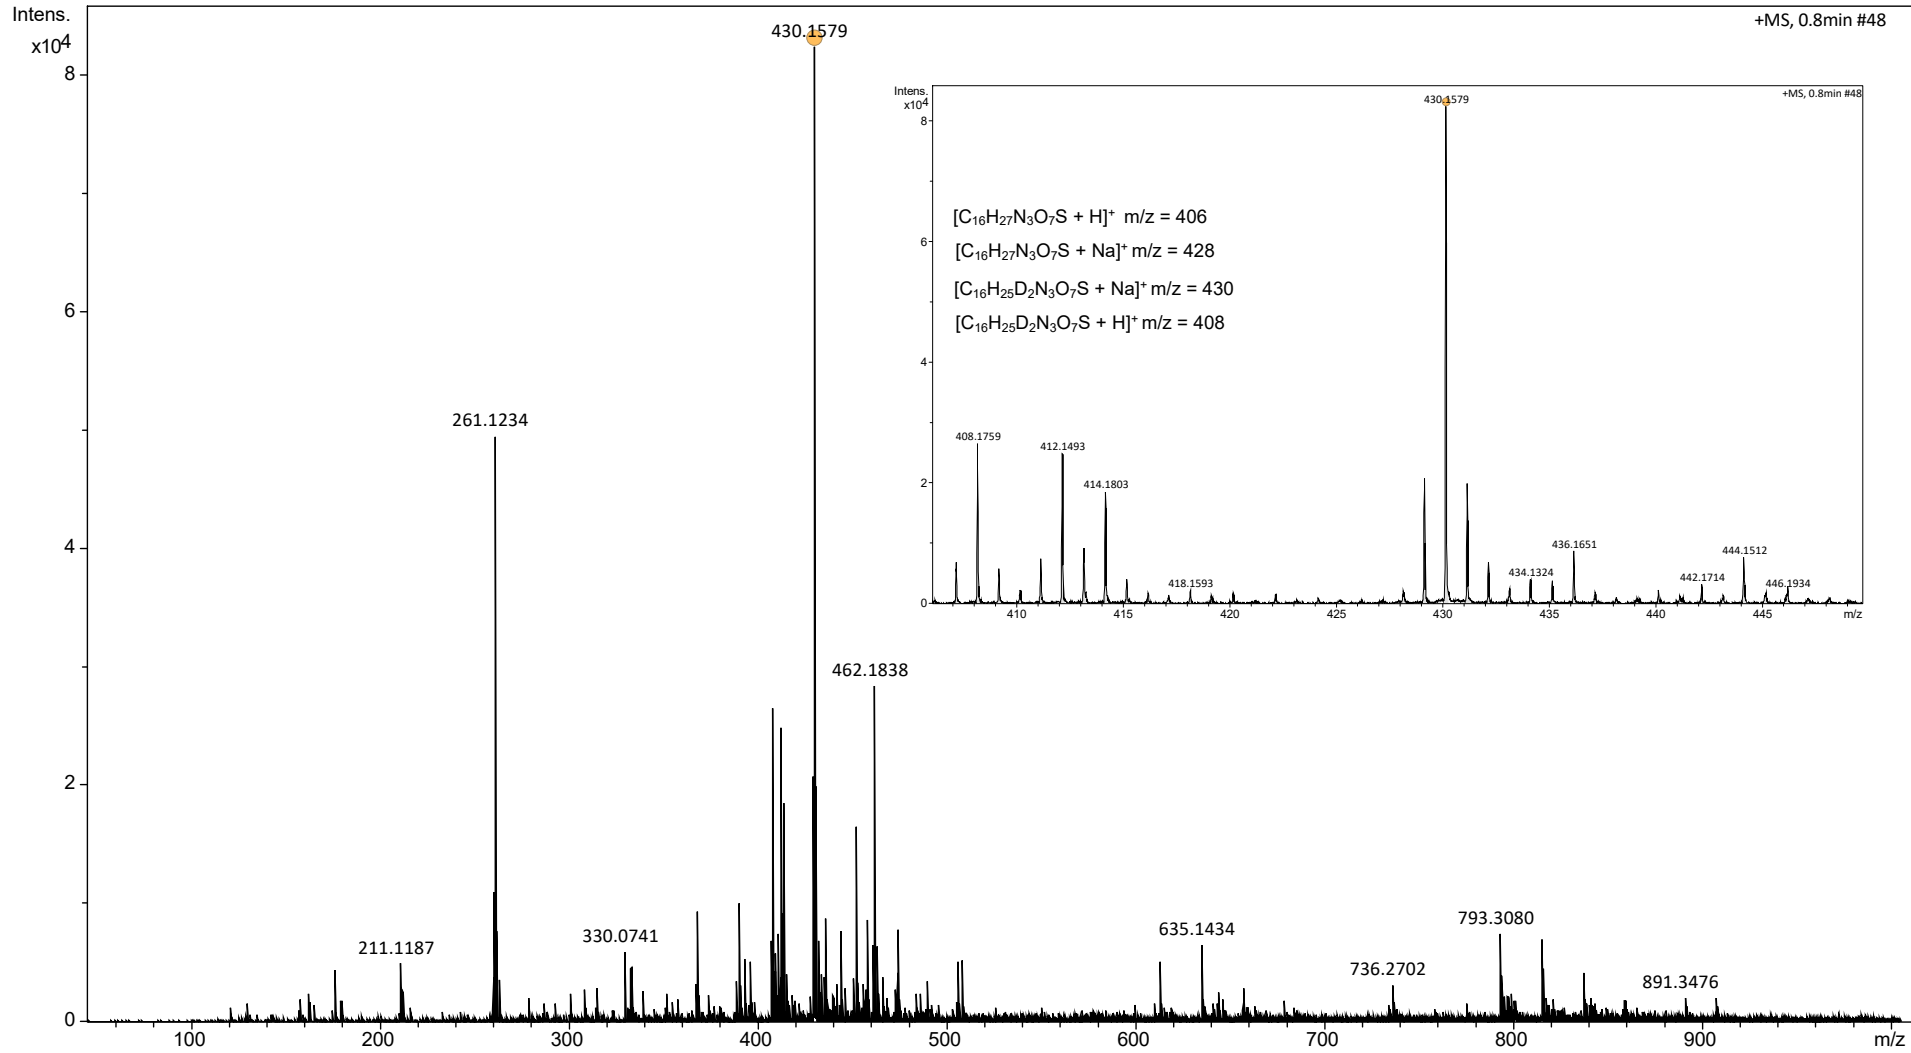

### Acquisition Parameter

|             |          |                       |           |                  |           |           |   |                                                                                  |          |           |        |         |        |     |                     |        |
|-------------|----------|-----------------------|-----------|------------------|-----------|-----------|---|----------------------------------------------------------------------------------|----------|-----------|--------|---------|--------|-----|---------------------|--------|
| Source Type | ESI      | Ion Polarity          | Positive  | Set Nebulizer    | 0.4 Bar   | Meas. m/z | # | Ion Formula                                                                      | m/z      | err [ppm] | mSigma | # Sigma | Score  | rdb | e <sup>-</sup> Conf | N-Rule |
| Focus       | Active   | Set Capillary         | 4500 V    | Set Dry Heater   | 180 °C    | 430.1579  | 1 | C <sub>16</sub> H <sub>25</sub> D <sub>2</sub> N <sub>3</sub> NaO <sub>7</sub> S | 430.1587 | -2.1      | 23.7   | 1       | 100.00 | 4.5 | even                | ok     |
| Scan Begin  | 50 m/z   | Set End Plate Offset  | -500 V    | Set Dry Gas      | 4.0 l/min |           |   |                                                                                  |          |           |        |         |        |     |                     |        |
| Scan End    | 1000 m/z | Set Collision Cell RF | 150.0 Vpp | Set Divert Valve | Waste     |           |   |                                                                                  |          |           |        |         |        |     |                     |        |

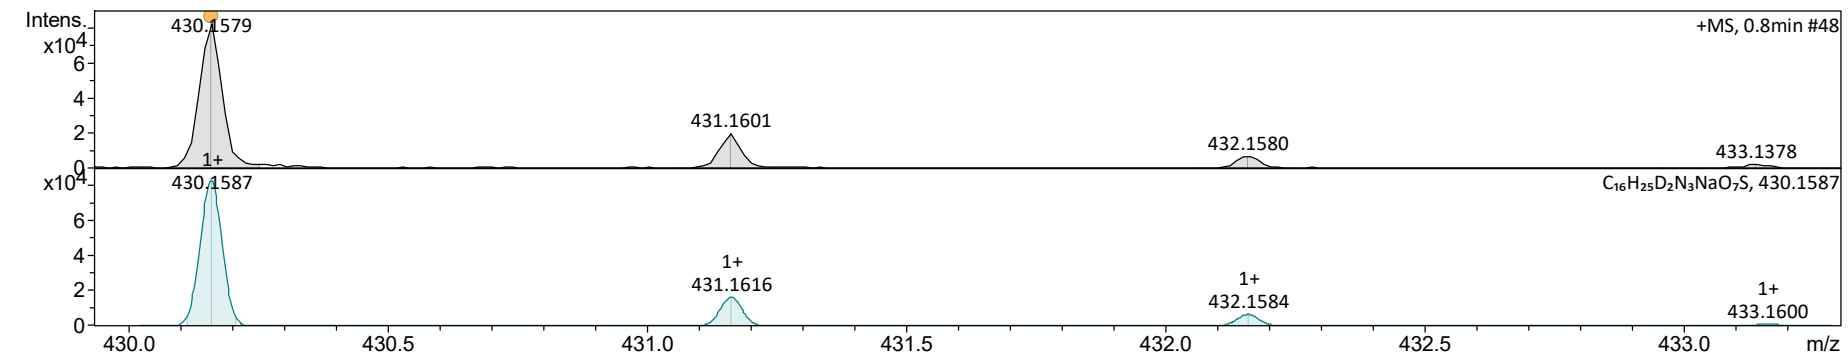

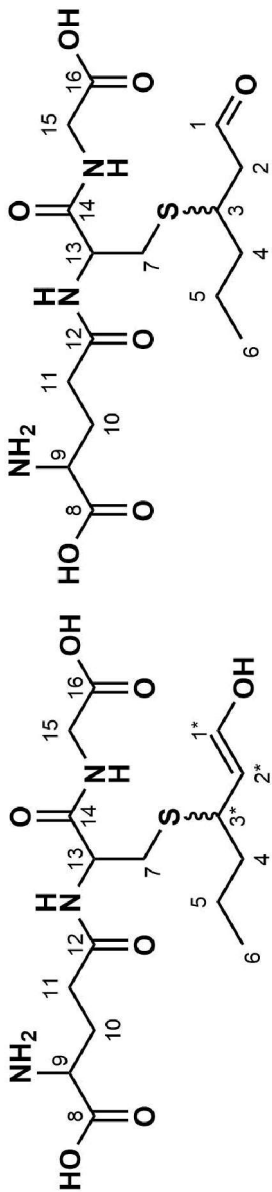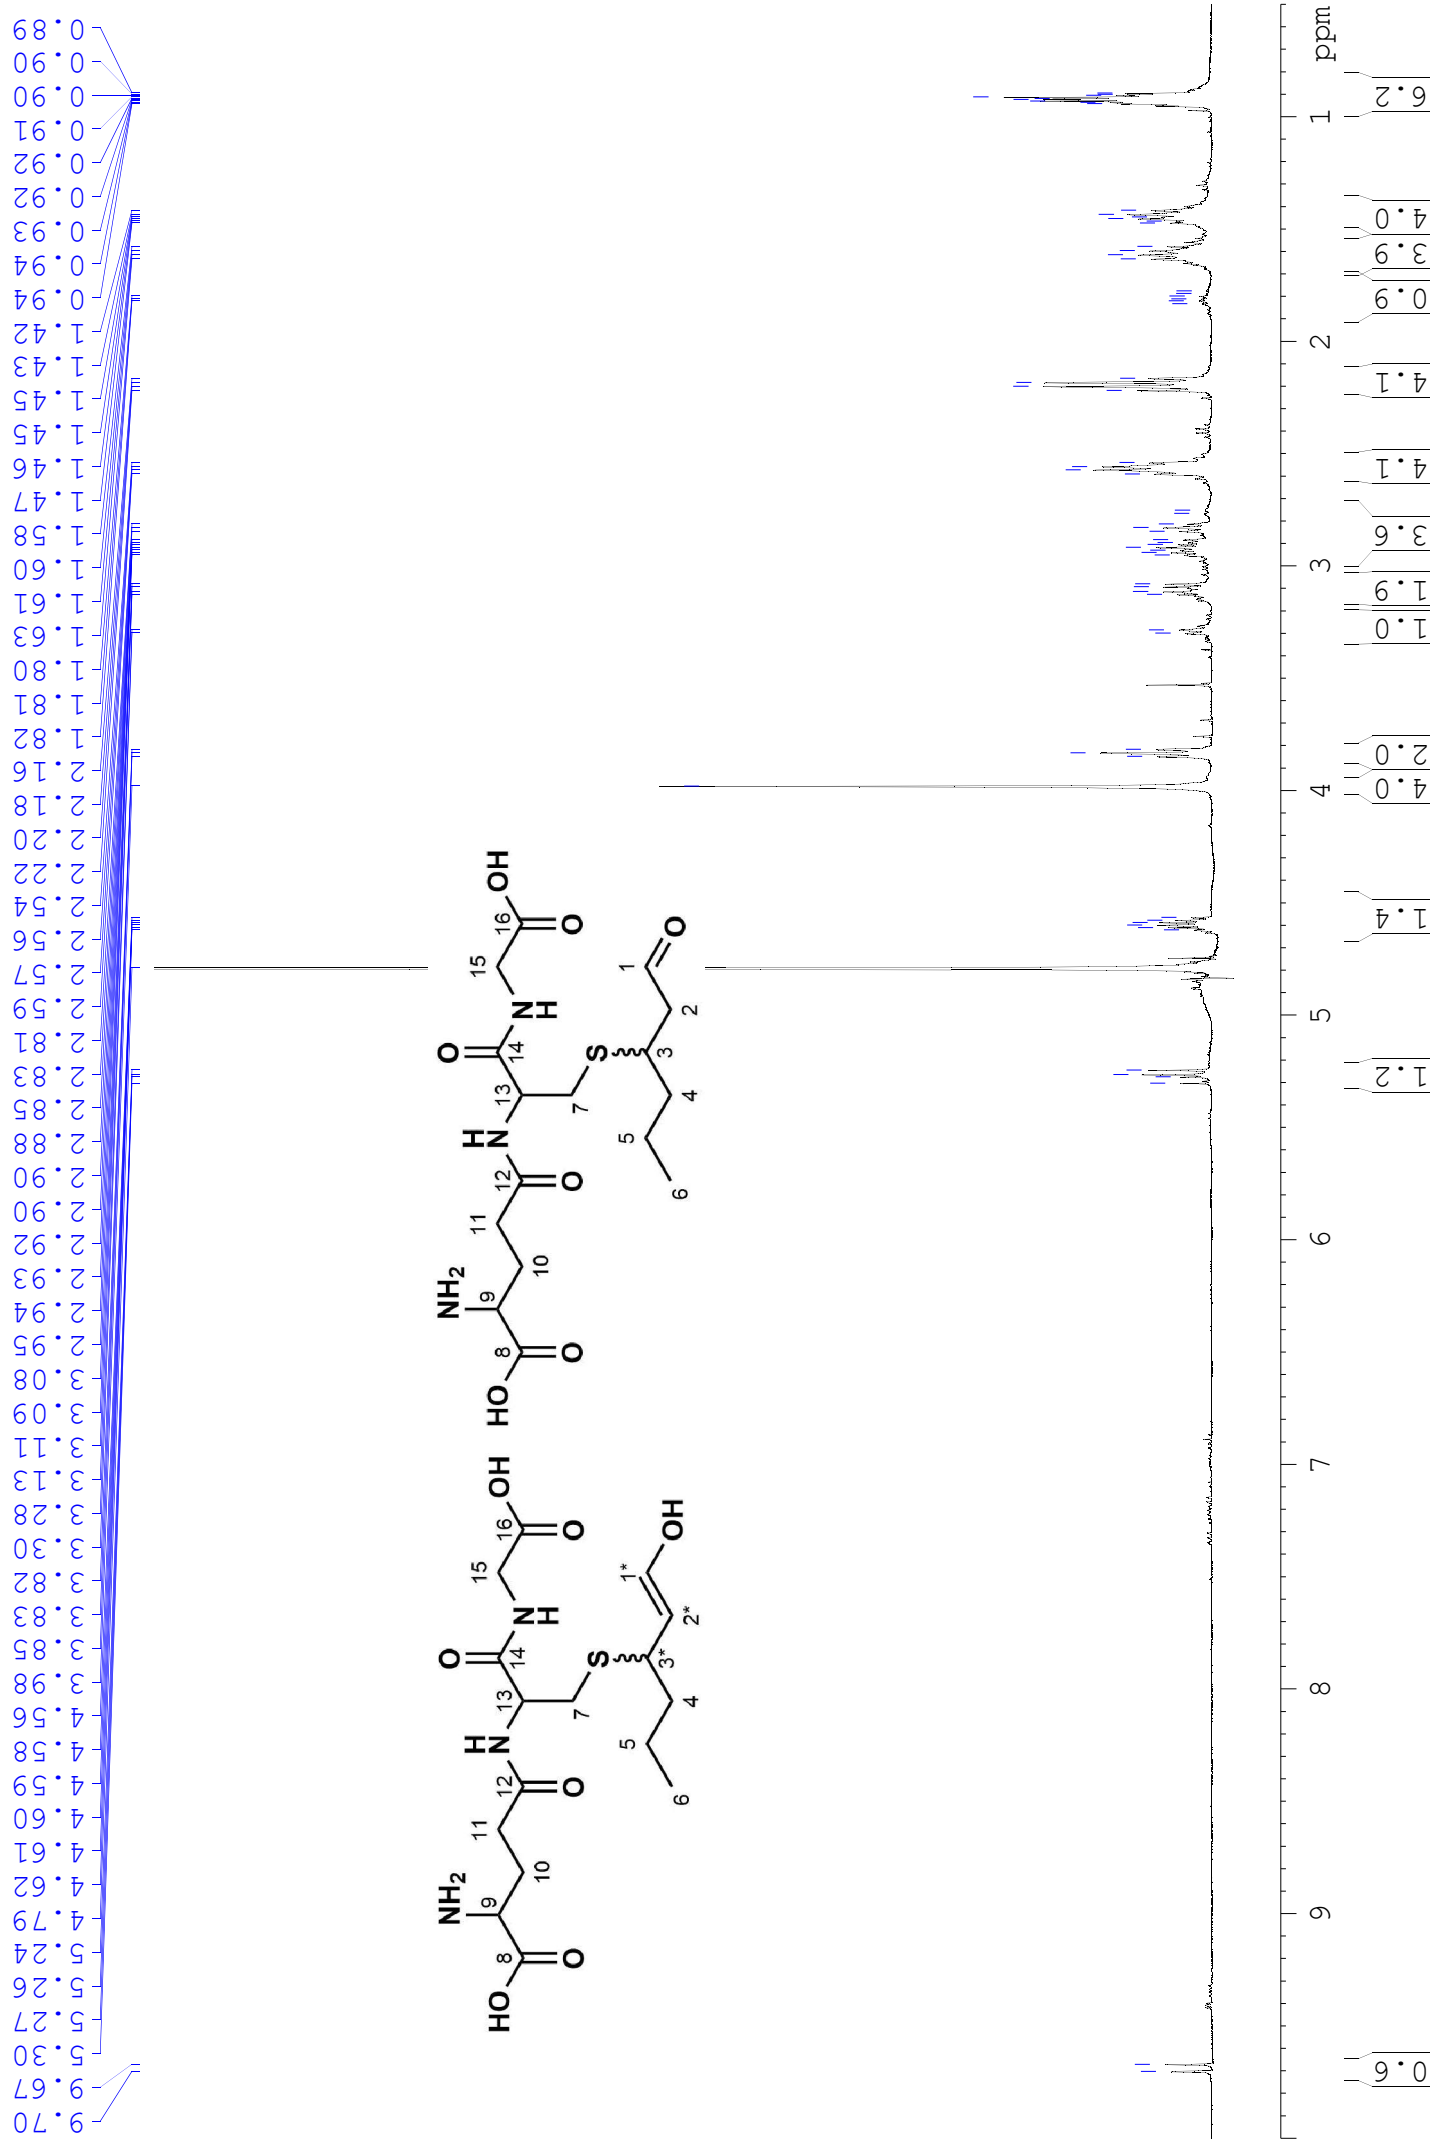

200 190 180 170 160 150 140 130 120 110 100 90 80 70 60 50 40 30 20 10 ppm

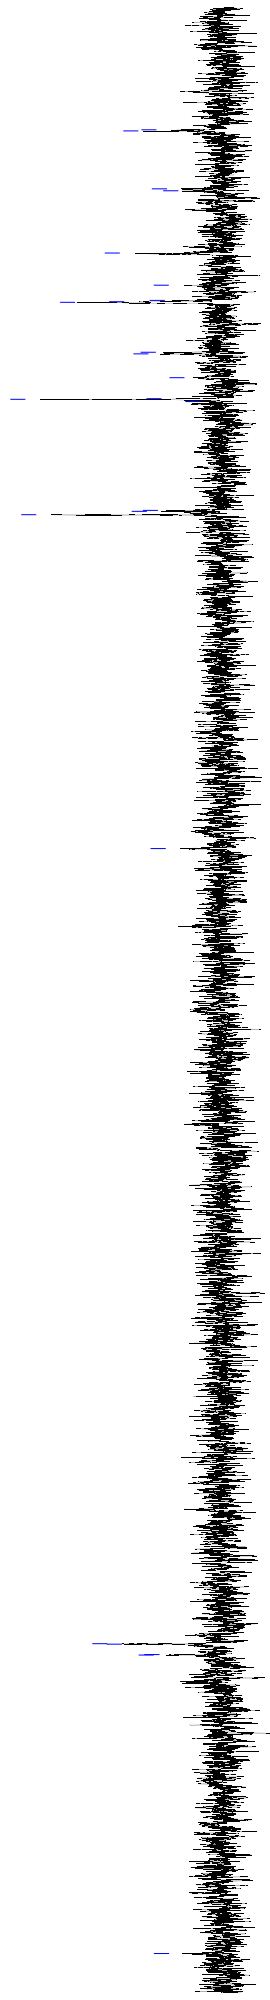

206.4  
174.8  
174.7  
173.6  
173.6  
89.2  
41.8  
41.5  
41.5  
39.3  
36.7  
36.6  
31.3  
31.2  
31.1  
29.4  
26.0  
19.4  
19.2  
13.1  
13.0
